# Supplementary material for: Truck Scheduling for Cross-Docking of Fresh Produce with Repeated Loading
Source: Hindawi journal article supplement (doi:10.1155/2021/5592122), 2021-06-21
Supplement: f1 [file 5592122.f1.pdf]

### Instance 1:

| Inbound truck  |     | Fresh product type |    |    |  |
|----------------|-----|--------------------|----|----|--|
| Truck          | 48  | 36                 | 84 | 72 |  |
|                | 89  | 127                | 64 | 0  |  |
|                | 75  | 105                | 15 | 15 |  |
|                | 0   | 260                | 0  | 0  |  |
| Outbound Truck |     | Fresh product type |    |    |  |
| Truck          | 151 | 0                  | 0  | 87 |  |
|                | 0   | 106                | 33 | 0  |  |
|                | 0   | 264                | 0  | 0  |  |
|                | 61  | 132                | 0  | 0  |  |

### Instance 2:

| Inbound truck  |     | Fresh product type |    |    |     |    |
|----------------|-----|--------------------|----|----|-----|----|
| <b>Truck</b>   | 48  | 85                 | 0  | 0  | 0   | 97 |
|                | 0   | 57                 | 0  | 47 | 66  | 0  |
|                | 80  | 0                  | 70 | 0  | 70  | 10 |
|                | 18  | 61                 | 0  | 43 | 30  | 18 |
|                | 76  | 10                 | 43 | 75 | 26  | 0  |
| Outbound Truck |     | Fresh product type |    |    |     |    |
| <b>Truck</b>   | 74  | 0                  | 75 | 99 | 72  | 23 |
|                | 123 | 124                | 0  | 0  | 0   | 0  |
|                | 0   | 0                  | 0  | 0  | 0   | 63 |
|                | 25  | 89                 | 38 | 66 | 120 | 39 |

### Instance 3:

| Inbound truck  |     | Fresh product type |     |     |    |    |    |     |
|----------------|-----|--------------------|-----|-----|----|----|----|-----|
|                | 14  | 28                 | 55  | 41  | 96 | 48 | 28 | 28  |
| <b>Truck</b>   | 116 | 41                 | 26  | 50  | 0  | 0  | 0  | 39  |
|                | 0   | 38                 | 64  | 64  | 0  | 0  | 0  | 114 |
| Outbound Truck |     | Fresh product type |     |     |    |    |    |     |
|                | 0   | 50                 | 0   | 0   | 32 | 24 | 13 | 102 |
| <b>Truck</b>   | 130 | 0                  | 145 | 0   | 0  | 24 | 0  | 0   |
|                | 0   | 57                 | 0   | 155 | 64 | 0  | 15 | 79  |

### Instance 4:

| Inbound truck | Fresh product type |
|---------------|--------------------|
| 1             | 1                  |
| 2             | 2                  |
| 3             | 3                  |
| 4             | 4                  |
| 5             | 5                  |
| 6             | 6                  |
| 7             | 7                  |
| 8             | 8                  |
| 9             | 9                  |
| 10            | 10                 |
| 11            | 11                 |
| 12            | 12                 |
| 13            | 13                 |
| 14            | 14                 |
| 15            | 15                 |
| 16            | 16                 |
| 17            | 17                 |
| 18            | 18                 |
| 19            | 19                 |
| 20            | 20                 |
| 21            | 21                 |
| 22            | 22                 |
| 23            | 23                 |
| 24            | 24                 |
| 25            | 25                 |
| 26            | 26                 |
| 27            | 27                 |
| 28            | 28                 |
| 29            | 29                 |
| 30            | 30                 |
| 31            | 31                 |
| 32            | 32                 |
| 33            | 33                 |
| 34            | 34                 |
| 35            | 35                 |
| 36            | 36                 |
| 37            | 37                 |
| 38            | 38                 |
| 39            | 39                 |
| 40            | 40                 |
| 41            | 41                 |
| 42            | 42                 |
| 43            | 43                 |
| 44            | 44                 |
| 45            | 45                 |
| 46            | 46                 |
| 47            | 47                 |
| 48            | 48                 |
| 49            | 49                 |
| 50            | 50                 |
| 51            | 51                 |
| 52            | 52                 |
| 53            | 53                 |
| 54            | 54                 |
| 55            | 55                 |
| 56            | 56                 |
| 57            | 57                 |
| 58            | 58                 |
| 59            | 59                 |
| 60            | 60                 |
| 61            | 61                 |
| 62            | 62                 |
| 63            | 63                 |
| 64            | 64                 |
| 65            | 65                 |
| 66            | 66                 |
| 67            | 67                 |
| 68            | 68                 |
| 69            | 69                 |
| 70            | 70                 |
| 71            | 71                 |
| 72            | 72                 |
| 73            | 73                 |
| 74            | 74                 |
| 75            | 75                 |
| 76            | 76                 |
| 77            | 77                 |
| 78            | 78                 |
| 79            | 79                 |
| 80            | 80                 |
| 81            | 81                 |
| 82            | 82                 |
| 83            | 83                 |
| 84            | 84                 |
| 85            | 85                 |
| 86            | 86                 |
| 87            | 87                 |
| 88            | 88                 |
| 89            | 89                 |
| 90            | 90                 |
| 91            | 91                 |
| 92            | 92                 |
| 93            | 93                 |
| 94            | 94                 |
| 95            | 95                 |
| 96            | 96                 |
| 97            | 97                 |
| 98            | 98                 |
| 99            | 99                 |
| 100           | 100                |

|  |                |     |    |     |                           |    |    |     |    |
|--|----------------|-----|----|-----|---------------------------|----|----|-----|----|
|  |                | 39  | 6  | 6   | 22                        | 57 | 22 | 39  | 39 |
|  |                | 71  | 0  | 0   | 71                        | 0  | 78 | 0   | 0  |
|  | <b>Truck</b>   | 0   | 0  | 160 | 0                         | 0  | 0  | 0   | 0  |
|  |                | 0   | 40 | 25  | 45                        | 50 | 0  | 0   | 0  |
|  |                | 86  | 0  | 0   | 0                         | 14 | 0  | 72  | 58 |
|  | Outbound Truck |     |    |     |                           |    |    |     |    |
|  |                |     |    |     | <b>Fresh product type</b> |    |    |     |    |
|  |                | 0   | 12 | 0   | 0                         | 0  | 0  | 0   | 42 |
|  |                | 0   | 4  | 75  | 46                        | 50 | 60 | 0   | 9  |
|  | <b>Truck</b>   | 0   | 0  | 41  | 31                        | 20 | 0  | 111 | 18 |
|  |                | 103 | 13 | 75  | 61                        | 30 | 0  | 0   | 28 |
|  |                | 93  | 17 | 0   | 0                         | 21 | 40 | 0   | 0  |

---

#### Instance 5:

|  |                |     |    |    |                           |     |    |    |    |
|--|----------------|-----|----|----|---------------------------|-----|----|----|----|
|  | Inbound truck  |     |    |    |                           |     |    |    |    |
|  |                |     |    |    | <b>Fresh product type</b> |     |    |    |    |
|  |                | 170 | 0  | 0  | 0                         | 0   | 0  | 0  | 0  |
|  |                | 6   | 6  | 19 | 50                        | 38  | 6  | 19 | 56 |
|  | <b>Truck</b>   | 49  | 31 | 60 | 0                         | 0   | 12 | 37 | 31 |
|  |                | 0   | 0  | 0  | 0                         | 143 | 0  | 47 | 0  |
|  |                | 0   | 0  | 0  | 58                        | 36  | 0  | 72 | 14 |
|  | Outbound Truck |     |    |    |                           |     |    |    |    |
|  |                |     |    |    | <b>Fresh product type</b> |     |    |    |    |
|  |                | 75  | 12 | 59 | 0                         | 0   | 9  | 98 | 40 |
|  | <b>Truck</b>   | 150 | 0  | 0  | 0                         | 217 | 0  | 0  | 0  |
|  |                | 0   | 25 | 20 | 108                       | 0   | 9  | 77 | 61 |

---

#### Instance 6:

|  |                |    |     |    |                           |     |  |  |  |
|--|----------------|----|-----|----|---------------------------|-----|--|--|--|
|  |                |    |     |    |                           |     |  |  |  |
|  |                |    |     |    | <b>Fresh product type</b> |     |  |  |  |
|  |                | 22 | 22  | 66 | 37                        | 73  |  |  |  |
|  | <b>Truck</b>   | 0  | 100 | 60 | 90                        | 0   |  |  |  |
|  |                | 0  | 0   | 0  | 217                       | 43  |  |  |  |
|  |                | 11 | 89  | 22 | 101                       | 67  |  |  |  |
|  | Outbound Truck |    |     |    |                           |     |  |  |  |
|  |                |    |     |    | <b>Fresh product type</b> |     |  |  |  |
|  |                | 22 | 0   | 0  | 0                         | 0   |  |  |  |
|  | <b>Truck</b>   | 0  | 0   | 0  | 159                       | 133 |  |  |  |
|  |                | 3  | 0   | 92 | 159                       | 33  |  |  |  |
|  |                | 8  | 211 | 56 | 127                       | 17  |  |  |  |

---

**Instance 7:**

| Inbound truck  |  | Fresh product type |     |     |    |     |     |
|----------------|--|--------------------|-----|-----|----|-----|-----|
| Truck          |  | 14                 | 69  | 28  | 0  | 69  | 0   |
|                |  | 50                 | 0   | 0   | 40 | 0   | 70  |
|                |  | 0                  | 190 | 0   | 0  | 0   | 0   |
|                |  | 23                 | 0   | 115 | 0  | 92  | 0   |
|                |  | 0                  | 0   | 44  | 0  | 66  | 110 |
| Outbound Truck |  | Fresh product type |     |     |    |     |     |
| Truck          |  | 50                 | 0   | 36  | 0  | 0   | 95  |
|                |  | 0                  | 194 | 53  | 0  | 62  | 74  |
|                |  | 37                 | 65  | 18  | 40 | 165 | 11  |
|                |  | 0                  | 0   | 80  | 0  | 0   | 0   |

**Instance 8:**

| Inbound truck  |    | Fresh product type |     |    |    |    |    |
|----------------|----|--------------------|-----|----|----|----|----|
| Truck          | 64 | 75                 | 75  | 0  | 0  | 0  | 96 |
|                | 0  | 0                  | 300 | 0  | 0  | 0  | 0  |
|                | 57 | 72                 | 0   | 36 | 65 | 50 | 0  |
| Outbound Truck |    | Fresh product type |     |    |    |    |    |
| Truck          | 0  | 38                 | 113 | 0  | 0  | 0  | 22 |
|                | 0  | 58                 | 0   | 0  | 50 | 12 | 12 |
|                | 61 | 19                 | 131 | 11 | 10 | 0  | 20 |
|                | 40 | 0                  | 0   | 18 | 5  | 26 | 17 |
|                | 20 | 32                 | 131 | 7  | 0  | 12 | 25 |

**Instance 9:**

| Inbound truck  |     | Fresh product type |     |    |    |    |    |    |
|----------------|-----|--------------------|-----|----|----|----|----|----|
| Truck          | 0   | 32                 | 18  | 45 | 32 | 41 | 0  | 32 |
|                | 58  | 52                 | 0   | 0  | 47 | 35 | 12 | 46 |
|                | 187 | 0                  | 0   | 0  | 53 | 0  | 0  | 0  |
|                | 0   | 0                  | 111 | 99 | 0  | 0  | 0  | 0  |
| Outbound Truck |     | Fresh product type |     |    |    |    |    |    |
| Truck          | 245 | 12                 | 0   | 52 | 37 | 33 | 6  | 0  |
|                | 0   | 42                 | 0   | 92 | 26 | 43 | 0  | 0  |
|                | 0   | 0                  | 0   | 0  | 43 | 0  | 0  | 78 |
|                | 0   | 30                 | 129 | 0  | 26 | 0  | 6  | 0  |

**Instance 10:**

| Inbound truck  |    | Fresh product type |    |    |     |    |    |    |     |
|----------------|----|--------------------|----|----|-----|----|----|----|-----|
| Truck          | 64 | 58                 | 19 | 38 | 19  | 58 | 19 | 7  | 58  |
|                | 0  | 0                  | 0  | 0  | 132 | 0  | 0  | 0  | 118 |
|                | 0  | 49                 | 0  | 0  | 0   | 0  | 97 | 49 | 145 |
| Outbound Truck |    | Fresh product type |    |    |     |    |    |    |     |
| Truck          | 0  | 0                  | 0  | 38 | 0   | 29 | 0  | 28 | 0   |
|                | 0  | 0                  | 0  | 0  | 151 | 10 | 12 | 28 | 0   |
|                | 0  | 41                 | 0  | 0  | 0   | 19 | 61 | 0  | 229 |
|                | 64 | 66                 | 19 | 0  | 0   | 0  | 43 | 0  | 92  |
